# Supplementary material for: Association of Albumin-Bilirubin Grade and Sequential Treatment with Standard Systemic Therapies for Advanced Hepatocellular Carcinoma: A Retrospective Cohort Study Using a Japanese Administrative Database
Source: Springer Nature journal article supplement (doi:10.1007/s40801-021-00245-8), 2021-04-01

## **SUPPLEMENTAL ONLINE MATERIAL**

### **JOURNAL**

*Drugs – Real World Outcomes*

### **TITLE**

**Association of Albumin-Bilirubin Grade and Sequential Treatment With Standard Systemic Therapies for Advanced Hepatocellular Carcinoma: A Retrospective Cohort Study Using a Japanese Administrative Database**

### **AUTHORS**

Atsushi Hiraoka<sup>1</sup>, Yoshinori Tanizawa<sup>2</sup>, Yu-Jing Huang<sup>3</sup>, Zhihong Cai<sup>2</sup>, Sachi Sakaguchi<sup>2</sup>

### **AUTHORS' AFFILIATIONS**

<sup>1</sup> Gastroenterology Center, Ehime Prefectural Central Hospital, Matsuyama, Japan

<sup>2</sup> Medicines Development Unit-Japan, Eli Lilly Japan K.K., Kobe, Japan

<sup>3</sup> Eli Lilly and Company, Indianapolis, IN, USA

### **CORRESPONDING AUTHOR**

Yoshinori Tanizawa

Medicines Development Unit-Japan

Eli Lilly Japan K.K.

Lilly Plaza One Bldg.

5-1-28 Isogamidori, Chuo-Ku

Kobe 651-0086, Japan

Tel: +81-80-9305-2141

E-mail: [tanizawa\\_yoshinori@lilly.com](mailto:tanizawa_yoshinori@lilly.com)

ORCID: 0000-0002-5014-2483

**Supplemental Table 1** Diagnostic criteria

| Diagnosis                | ICD-10 code or disease code and description                                                                                                                                                                                                                                                                                               |
|--------------------------|-------------------------------------------------------------------------------------------------------------------------------------------------------------------------------------------------------------------------------------------------------------------------------------------------------------------------------------------|
| Hepatocellular carcinoma | C22.0: Malignant neoplasm: Liver cell carcinoma<br>8842916: Combined hepatocellular carcinoma and cholangiocarcinoma (part of C22.7)                                                                                                                                                                                                      |
| Diabetes                 | E10: Type 1 diabetes mellitus<br>E11: Type 2 diabetes mellitus<br>E12: Malnutrition-related diabetes mellitus<br>E13: Other specified diabetes mellitus<br>E14: Unspecified diabetes mellitus                                                                                                                                             |
| Hepatitis B              | B18.0: Chronic viral hepatitis B with delta-agent<br>B18.1: Chronic viral hepatitis B without delta-agent                                                                                                                                                                                                                                 |
| Hepatitis C              | B18.2: Chronic viral hepatitis C                                                                                                                                                                                                                                                                                                          |
| Alcoholic liver disease  | K70: Alcoholic liver disease                                                                                                                                                                                                                                                                                                              |
| Any liver disease        | K70: Alcoholic liver disease<br>K71: Toxic liver disease<br>K72: Hepatic failure, not elsewhere classified<br>K73: Chronic hepatitis, not elsewhere classified<br>K74: Fibrosis and cirrhosis of liver<br>K75: Other inflammatory liver diseases<br>K76: Other diseases of liver<br>K77: Liver disorders in diseases classified elsewhere |

*ICD-10* International Statistical Classification of Diseases and Related Health Problems, 10th

Revision

**Supplemental Table 2** Cox regression analysis of factors associated with overall duration of systemic treatment

| Covariate                                                                                  | Hazard ratio (95% CI) | P value |
|--------------------------------------------------------------------------------------------|-----------------------|---------|
| ALBI at baseline (grade 2b or 3 vs. grade 1 or 2a)                                         | 1.61 (1.22–2.13)      | 0.0009  |
| Designated cancer hospital (yes vs. no)                                                    | 0.79 (0.56–1.11)      | 0.1698  |
| Age at index date, years                                                                   | 0.99 (0.98–1.01)      | 0.4222  |
| Sex (male vs. female)                                                                      | 0.85 (0.61–1.17)      | 0.3056  |
| Hospital admission within 60 days before index date (excluding on index date) (yes vs. no) | 0.98 (0.75–1.28)      | 0.8805  |
| Presence of diabetes at baseline (yes vs. no)                                              | 1.03 (0.80–1.32)      | 0.8361  |
| Presence of hepatitis B at baseline (yes vs. no)                                           | 1.25 (0.87–1.80)      | 0.2258  |
| Presence of hepatitis C at baseline (yes vs. no)                                           | 1.20 (0.92–1.57)      | 0.1796  |
| Presence of alcoholic liver disease (ICD-10 code K70) at baseline (yes vs. no)             | 0.87 (0.55–1.38)      | 0.5585  |
| Fibrosis-4 index at baseline                                                               | 1.04 (1.01–1.08)      | 0.0156  |
| Presence of TACE within 3 years before index date (yes vs. no)                             | 0.81 (0.61–1.06)      | 0.1243  |

A total of 384 patients were included in the Cox regression analysis. By the end of the observation period, 253 patients had stopped systemic treatment and 131 patients were still receiving systemic treatment

*CI* confidence interval, *ALBI* albumin-bilirubin, *ICD-10* International Statistical Classification of Diseases and Related Health Problems, 10th Revision, *TACE* transarterial chemoembolization

**Supplemental Fig. 1** Treatment sequence. Shown are the numbers of patients receiving each standard of care as index line (left), first subsequent line (middle), and second subsequent line (right) therapy in each cohort. *LEN* lenvatinib, *REG* regorafenib, *SOR* sorafenib

**Sorafenib A cohort**

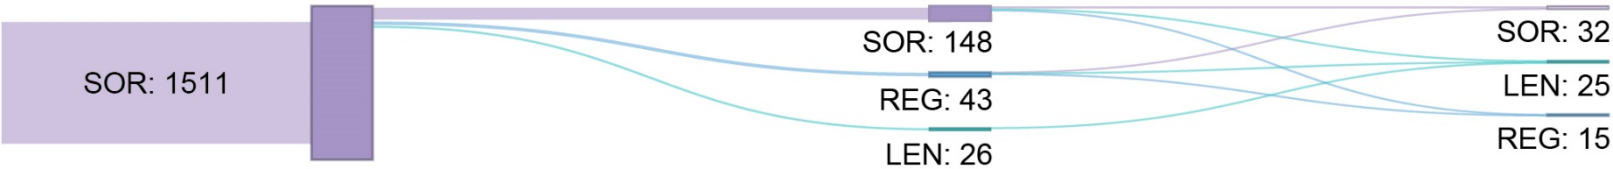

**Sorafenib B cohort**

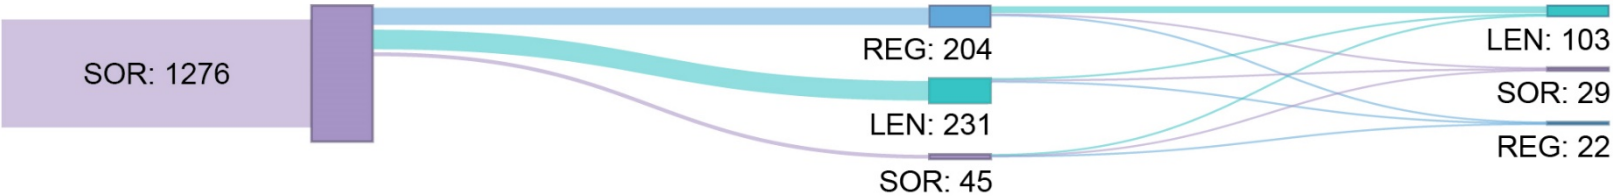

**Lenvatinib cohort**

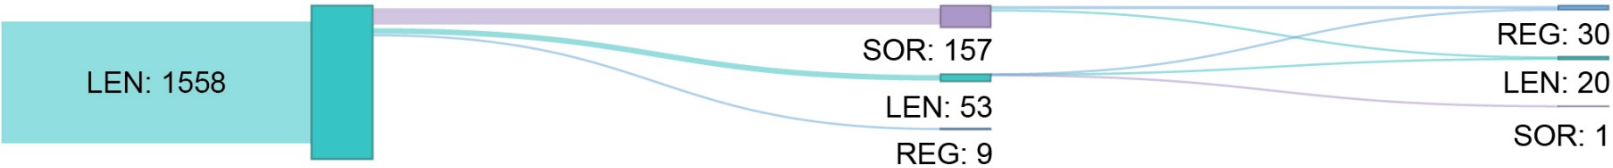

**Supplemental Fig. 2** Distribution of ALBI grade at baseline and at the end of index line treatment in patients from each cohort who completed index line treatment without TACE and who had ALBI scores available at both timepoints. The mean (SD) ALBI score and number of patients at each timepoint are shown under the ALBI grade distribution columns. 1L index line treatment (assumed first line), ALBI albumin-bilirubin, SD standard deviation, TACE transarterial chemoembolization

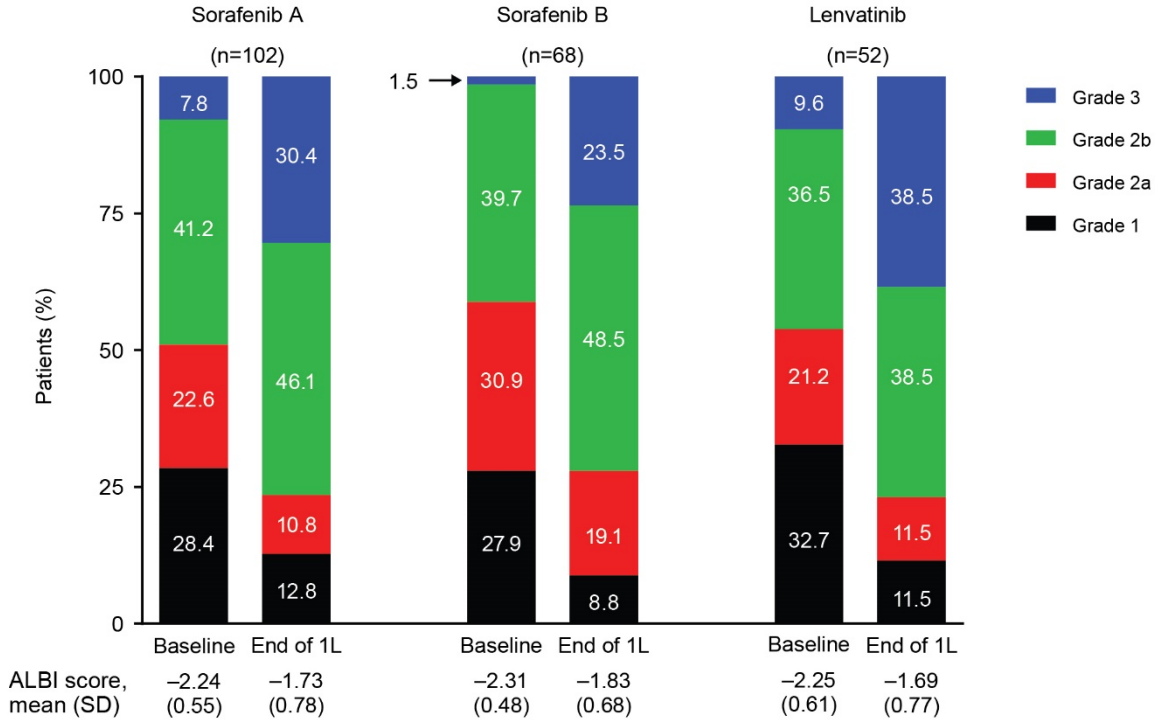

Supplement: MOESM1 [file 24440838]
